# Supplementary material
Source: PubMed Central journal article supplement (PMC3691629)
Supplement: NIHMS53574-supplement-01.pdf [file NIHMS53574-supplement-01.pdf]

| SNP ID     | Gene               | Chromosome | Minor allele | AA  | Aa | aa |
|------------|--------------------|------------|--------------|-----|----|----|
| rs993925   | TGFB2              | 1          | T            | 55  | 57 | 22 |
| rs12477314 | HDAC4              | 2          | T            | 87  | 39 | 5  |
| rs1529672  | RAR $\beta$        | 3          | C            | 93  | 38 | 0  |
| rs1344555  | MECOM              | 3          | T            | 80  | 45 | 7  |
| rs153916   | SPATA9             | 5          | T            | 46  | 66 | 18 |
| rs6903823  | ZKSCAN3/<br>ZNF323 | 6          | G            | 63  | 57 | 12 |
| rs2857595  | NCR3               | 6          | G            | 76  | 52 | 0  |
| rs2798641  | ARMC2              | 6          | T            | 95  | 37 | 3  |
| rs7068966  | CDC123             | 10         | T            | 85  | 42 | 2  |
| rs11001819 | C10orf11           | 10         | G            | 41  | 56 | 0  |
| rs11172113 | LRP1               | 12         | T            | 51  | 64 | 18 |
| rs1036429  | CCDC38             | 12         | T            | 38  | 66 | 0  |
| rs12447804 | MMP15              | 16         | T            | 76  | 55 | 4  |
| rs2571445  | TNS1               | 2          | G            | 51  | 62 | 23 |
| rs10498230 | PID1               | 2          | T            | 105 | 26 | 2  |
| rs2045517  | FAM13A             | 4          | T            | 45  | 65 | 26 |
| rs10516526 | GSTCD              | 4          | G            | 117 | 18 | 0  |
| rs17331332 | NPNT               | 4          | G            | 116 | 18 | 0  |
| rs6823809  | NPNT               | 4          | T            | 66  | 59 | 11 |
| rs1032296  | HHIP               | 4          | T            | 38  | 73 | 21 |
| rs11100860 | HHIP               | 4          | G            | 50  | 68 | 18 |
| rs11134779 | ADAM19             | 5          | G            | 53  | 64 | 16 |
| rs2070600  | AGER               | 6          | T            | 113 | 20 | 0  |

Supplementary Table 1. SNP code, target gene, chromosome and minor allele of the 23 analysed SNPs associated with adult lung function and previously showing directionally

consistent effects in children. Frequency of major allele (A) and minor allele (a) homozygotes/heterozygotes in our study also shown.
